# Supplementary material
Source: MDPI journal article supplement (https://www.mdpi.com/2073-4395/12/7/1663)
Supplement: s1 [file s1]

## Supplementary material

**Table S1.** Four Agriventis mungbean genotypes were selected for the screening of waterlogging tolerance at the pod filling stage with their line ID, progeny details and country of origin.

| No | Line ID | Progeny detail                        | Properties of parental line       | Year of selection/Country of origin |
|----|---------|---------------------------------------|-----------------------------------|-------------------------------------|
| 1  | AVTMB#1 | Cross between GMB VI × PHS1009        | High yielding and stress-tolerant | 2011/ Australia                     |
| 2  | AVTMB#2 | Cross between Unknown × PHS1007       | High yielding and stress-tolerant | 2012/Australia                      |
| 3  | AVTMB#3 | Cross between Green Lantern × PHS1019 | High yielding and stress-tolerant | 2013/Australia                      |
| 4  | AVTMB#4 | Cross between Green Lantern × unknown | High yielding and stress-tolerant | 2014/ Australia                     |

**Table S2.** Gas exchange ( $A_{\text{sat}}$ ,  $g_s$ ,  $C_i$ ,  $iWUE$ ), chlorophyll fluorescence ( $\Phi_{\text{PSII}}$ ,  $F_v/F_m$ , excitation pressure ( $1-qP$ )) and leaf chlorophyll contents (SPAD units) for five mungbean genotypes. These parameters were assessed at each measurement day in two-way analysis of variance ( $p < 0.05$ ). The p-values are represented along with the least significant difference (LSD) values in parenthesis. The significant effects were represented as bold.

| Gas exchange and chlorophyll fluorescence                 | Days after waterlogging stress | Genotypes (G)<br>p-value<br>(LSD) | Treatment (T)<br>p-value<br>(LSD) | G × T<br>p-value<br>(LSD)  |
|-----------------------------------------------------------|--------------------------------|-----------------------------------|-----------------------------------|----------------------------|
| $A_{\text{sat}}$ ( $\mu\text{mol m}^{-2} \text{s}^{-1}$ ) | 1                              | <b>0.018</b><br>(3.11)            | <b>&lt;0.001</b><br>(1.96)        | <b>0.007</b><br>(4.40)     |
|                                                           | 9                              | <b>0.016</b><br>(1.32)            | <b>&lt;0.001</b><br>(0.83)        | <b>&lt;0.001</b><br>(1.87) |
|                                                           | 23                             | <b>0.005</b><br>(1.73)            | <b>&lt;0.001</b><br>(1.09)        | <b>0.012</b><br>(2.45)     |
|                                                           | 30                             | <b>&lt;0.001</b><br>(1.67)        | <b>&lt;0.001</b><br>(1.05)        | <b>&lt;0.001</b><br>(2.36) |

|                                           |    |                  |                  |                  |
|-------------------------------------------|----|------------------|------------------|------------------|
| gs (mol m <sup>-2</sup> s <sup>-1</sup> ) | 1  | <0.001<br>(0.04) | <0.001<br>(0.02) | 0.620<br>(0.06)  |
|                                           | 9  | 0.158<br>(0.03)  | <0.001<br>(0.02) | <0.001<br>(0.05) |
|                                           | 23 | <0.001<br>(0.03) | <0.001<br>(0.02) | <0.001<br>(0.04) |
|                                           | 30 | <0.001<br>(0.02) | <0.001<br>(0.01) | 0.013<br>(0.02)  |
| iWUE (μmol mol <sup>-1</sup> )            | 1  | 0.276<br>(7.61)  | 0.214<br>(4.81)  | 0.078<br>(10.76) |
|                                           | 9  | 0.017<br>(10.45) | 0.730<br>(6.61)  | 0.003<br>(14.77) |
|                                           | 23 | <0.001<br>(5.31) | 0.120<br>(3.35)  | 0.036<br>(7.51)  |
|                                           | 30 | <0.001<br>(7.34) | 0.341<br>(4.64)  | 0.001<br>(10.38) |
| ΦPSII                                     | 1  | <0.001<br>(0.01) | <0.001<br>(0.01) | 0.065<br>(0.02)  |
|                                           | 9  | 1.999<br>(0.02)  | 0.020<br>(0.01)  | 0.081<br>(0.03)  |
|                                           | 23 | 0.302<br>(0.03)  | 0.052<br>(0.02)  | 0.652<br>(0.04)  |
|                                           | 30 | 0.003<br>(0.01)  | <0.001<br>(0.01) | <0.001<br>(0.02) |
| Fv/Fm                                     | 1  | 0.023<br>(0.008) | 0.026<br>(0.005) | 0.013<br>(0.01)  |
|                                           | 9  | 0.282<br>(0.01)  | 0.15<br>(0.01)   | 0.996<br>(0.02)  |
|                                           | 23 | 0.159<br>(0.01)  | <0.001<br>(0.01) | 0.141<br>(0.02)  |
|                                           | 30 | 0.112<br>(0.03)  | <0.001<br>(0.02) | 0.414<br>(0.04)  |

|                                          |    |                                   |                                    |                                   |
|------------------------------------------|----|-----------------------------------|------------------------------------|-----------------------------------|
| 1-qP                                     | 1  | <b>&lt;0.001</b><br><b>(0.02)</b> | <b>&lt;0.001</b><br><b>(0.014)</b> | <b>&lt;0.001</b><br><b>(0.03)</b> |
|                                          | 9  | 0.343<br>(0.03)                   | <b>&lt;0.001</b><br><b>(0.02)</b>  | <b>&lt;0.001</b><br><b>(0.05)</b> |
|                                          | 23 | 0.251<br>(0.05)                   | <b>0.017</b><br><b>(0.03)</b>      | 0.854<br>(0.07)                   |
|                                          | 30 | 0.059<br>(0.04)                   | <b>0.011</b><br><b>(0.02)</b>      | <b>&lt;0.001</b><br><b>(0.06)</b> |
| Leaf chlorophyll<br>contents (SPAD unit) | 1  | <b>0.028</b><br><b>(1.29)</b>     | <b>&lt;0.001</b><br><b>(0.82)</b>  | <b>0.001</b><br><b>(1.83)</b>     |
|                                          | 9  | 0.108<br>(1.26)                   | <b>&lt;0.001</b><br><b>(0.802)</b> | 0.272<br>(1.79)                   |
|                                          | 23 | 0.314<br>(1.16)                   | <b>0.013</b><br><b>(0.734)</b>     | 0.300<br>(1.64)                   |
|                                          | 30 | 0.050<br>(1.07)                   | <b>&lt;0.001</b><br><b>(0.68)</b>  | <b>0.023</b><br><b>(1.52)</b>     |
|                                          | 1  | <b>0.018</b><br><b>(3.11)</b>     | <b>&lt;0.001</b><br><b>(1.96)</b>  | <b>0.007</b><br><b>(4.40)</b>     |
|                                          | 9  | <b>0.016</b><br><b>(1.32)</b>     | <b>&lt;0.001</b><br><b>(0.83)</b>  | <b>&lt;0.001</b><br><b>(1.87)</b> |
